# Supplementary material for: Validation of the Greek Version of the Diabetes Management Self-Efficacy Scale (GR-DMSES)
Source: PubMed Central journal article supplement — Adv Ther. 2016 Jan 21;33(1):82–95. doi: 10.1007/s12325-015-0278-1 (PMC4735230; doi:10.1007/s12325-015-0278-1), 2016-01-21
Supplement: 12325_2015_278_MOESM1_ESM.pdf [file 12325_2015_278_MOESM1_ESM.pdf]

## *Why carry out this study?*

- Self-efficacy has been found to have a direct relation with self-care in diabetes.
- Several tools have been developed and used for evaluating self-efficacy of diabetic patients, the most widely used being the Diabetes Management Self-Efficacy Scale (DMSES).
- The aim of the present study was to translate, culturally adapt, and validate the Greek DMSES (GR-DMES) in order for it to be used in the ATTICA pilot study of the SmartCare EU-funded project.

## *What was learned from the study?*

- The findings supported that the GR-DMSES was reliable and valid in measuring self-efficacy related to diabetes self-management, thus providing a quick and easy to use tool to health professionals dealing with Greek adults with type 2 diabetes.

This summary slide represents the opinions of the authors. No funding or sponsorship was received for this study or publication of this article. For a full list of acknowledgments and disclosures for all authors of this article, please see the full text online. © The Author(s) 2015. Creative Commons Attribution Noncommercial License (CC BY-NC).
